# Supplementary material for: Bifunctional Au-templated RNA nanoparticles enable direct cell uptake detection and GRP75 knockdown in prostate cancer
Source: Royal Society of Chemistry journal article supplement (doi:10.1039/c9tb02438g), 2020-01-01
Supplement: c9tb02438g1.pdf [file c9tb02438g1.pdf]

## Supplementary Information

# Bifunctional Au-templated RNA Nanoparticles Enable Direct Cell Uptake Detection and Treatment in Prostate Cancer

*Sunil S. Shah<sup>a</sup>, Christopher N. Cultrara<sup>a</sup>, Jorge A. Ramos<sup>b</sup>; Uri Samuni<sup>b</sup>, Jenny Zilberberg<sup>c,‡</sup> and  
David Sabatino<sup>a,‡,\*</sup>*

<sup>a</sup>Department of Chemistry and Biochemistry, Seton Hall University, 400 South Orange Avenue,  
South Orange, New Jersey 07079, United States.

<sup>b</sup>Department of Chemistry and Biochemistry, Queens College, City University of New York,  
Flushing, NY 11367, USA and the Ph.D. Programs in Biochemistry and Chemistry, The  
Graduate Center of the City University of New York, New York, NY 10016.

<sup>c</sup>Center for Discovery and Innovation, Hackensack University Medical Center, 340 Kingsland  
Street, Building 102, Nutley, New Jersey 07110.

\*Corresponding Author: David Sabatino: Email ID : [david.sabatino@shu.edu](mailto:david.sabatino@shu.edu)

Tel : +1-973-313-6359

## TABLE OF CONTENTS

|              |                                                                                                                                                                                              |      |
|--------------|----------------------------------------------------------------------------------------------------------------------------------------------------------------------------------------------|------|
| Table S1     | DLS data for RNA hybrids with and without gold nanoparticles                                                                                                                                 | S3   |
| Figures S1-5 | HPLC chromatograms of 1. Amino-Functionalized GRP75 A1 strand; 2. GRP75 S1 strand; 3. Amino functionalized NS A1strand; 4. NS S1strand RNA and 5. Palmitamide conjugated GRP75 S1strand RNA. | S4-9 |
| Figure S6    | High screen content microscopy images for PC-3 cell uptake by FITC-RNA hybrids and citrate-stabilized Au nanoparticles at 30 h.                                                              | S9   |
| Figure S7    | Flow-cytometry data for PC-3 cell viability using Annexing V-PI stain.                                                                                                                       | S10  |

**Table S1.** DLS data for RNA hybrids with and without gold nanoparticles

| Samples        | Effective Particle<br>Size (nm) | Polydispersity Index | Zeta Potential   |
|----------------|---------------------------------|----------------------|------------------|
| 75A1S1         | $674 \pm 146$                   | $0.55 \pm 0.11$      | $-1.1 \pm 0.58$  |
| NSA1S1         | $1186 \pm 77$                   | $0.58 \pm 0.03$      | $-0.6 \pm 0.58$  |
| 75A1S1C16      | $484 \pm 50$                    | $0.63 \pm 0.10$      | $-2.5 \pm 1.40$  |
| 75A1S1_Gold    | $24 \pm 2$                      | $0.37 \pm 0.09$      | $-17.6 \pm 1.7$  |
| NSA1S1_Gold    | $19 \pm 2$                      | $0.51 \pm 0.06$      | $-12.6 \pm 1.2$  |
| 75A1S1C16_Gold | $102 \pm 66$                    | $0.41 \pm 0.07$      | $-17.1 \pm 1.65$ |

SAMPLE INFORMATION

|                                          |              |                     |                           |
|------------------------------------------|--------------|---------------------|---------------------------|
| Sample Name:                             | 75A1NH2      | Acquired By:        | System                    |
| Sample Type:                             | Unknown      | Sample Set Name:    | PURITY                    |
| Vial:                                    | 5            | Acq. Method Set:    | DS_RNA analysis_4_9_19_MS |
| Injection #:                             | 1            | Processing Method:  | Default                   |
| Injection Volume:                        | 25.00 ul     | Channel Name:       | 2487Channel 1             |
| Run Time:                                | 25.0 Minutes | Proc. Chnl. Descr.: |                           |
| Date Acquired: 5/30/2019 2:42:05 PM EDT  |              |                     |                           |
| Date Processed: 6/6/2019 11:57:43 AM EDT |              |                     |                           |

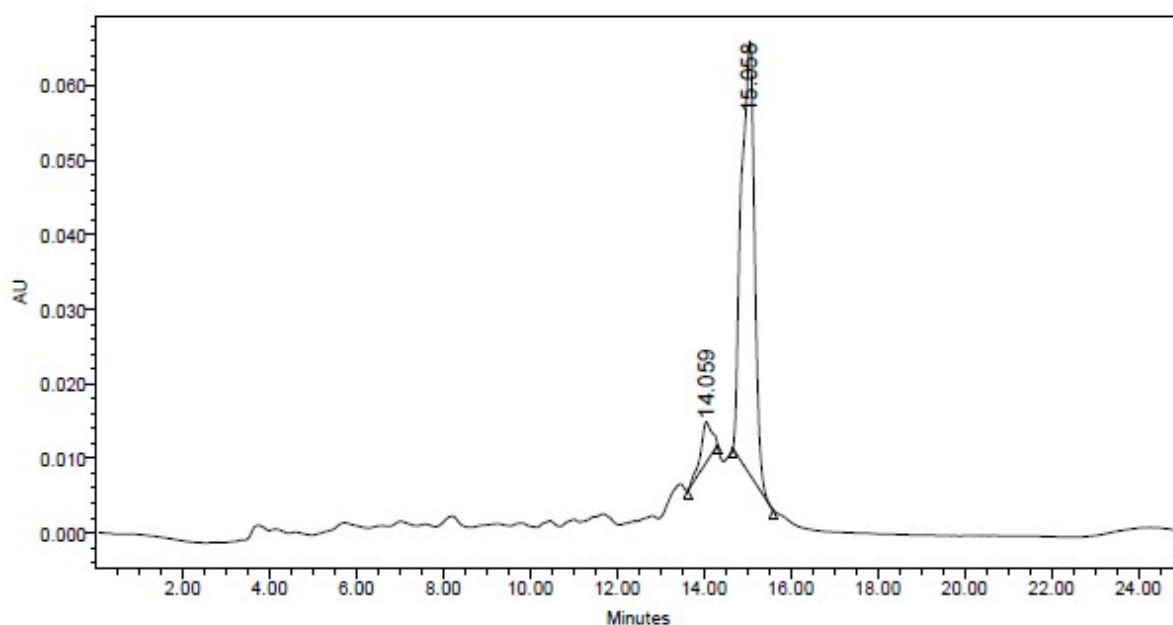

|   | RT     | Area    | % Area | Height |
|---|--------|---------|--------|--------|
| 1 | 14.059 | 95143   | 7.30   | 5351   |
| 2 | 15.058 | 1208269 | 92.70  | 58261  |

**Figure S1.** HPLC chromatogram of amino functionalized GRP75 A1 RNA

SAMPLE INFORMATION

|                                          |              |                     |                           |
|------------------------------------------|--------------|---------------------|---------------------------|
| Sample Name:                             | 75S1         | Acquired By:        | System                    |
| Sample Type:                             | Unknown      | Sample Set Name:    | PURITY                    |
| Vial:                                    | 6            | Acq. Method Set:    | DS_RNA analysis_4_9_19_MS |
| Injection #:                             | 1            | Processing Method:  | Default                   |
| Injection Volume:                        | 25.00 ul     | Channel Name:       | 2487Channel 1             |
| Run Time:                                | 25.0 Minutes | Proc. Chnl. Descr.: |                           |
| Date Acquired: 5/30/2019 3:08:08 PM EDT  |              |                     |                           |
| Date Processed: 6/6/2019 11:58:24 AM EDT |              |                     |                           |

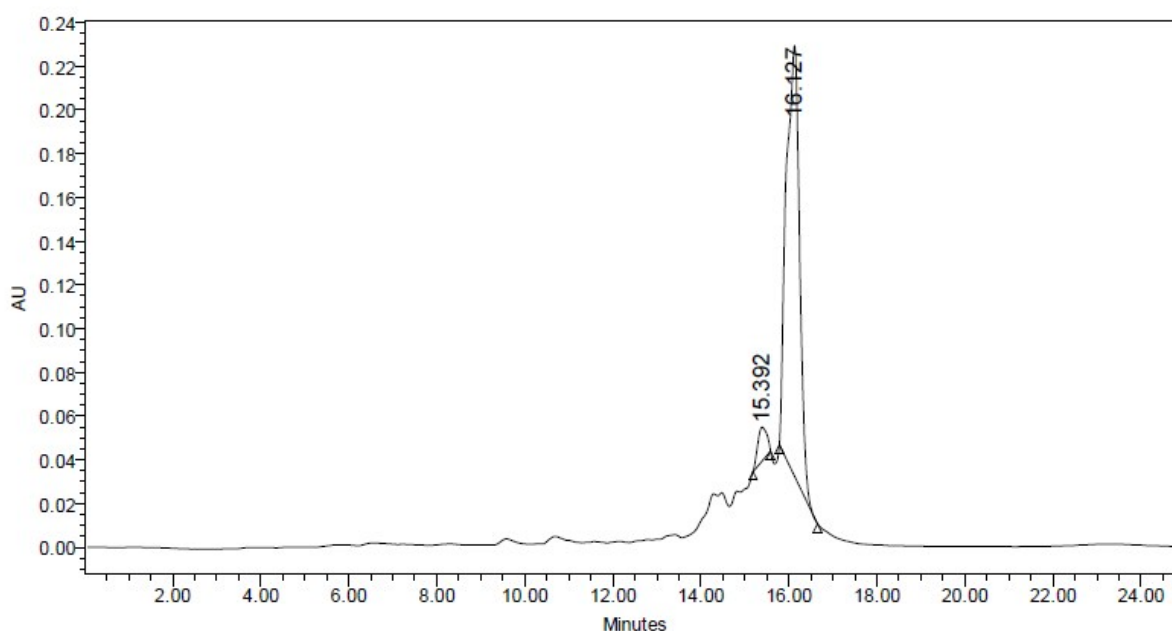

|   | RT     | Area    | % Area | Height |
|---|--------|---------|--------|--------|
| 1 | 15.392 | 222437  | 5.15   | 15626  |
| 2 | 16.127 | 4094945 | 94.85  | 197157 |

**Figure S2.** HPLC chromatogram of GRP75 S1 RNA

SAMPLE INFORMATION

|                                          |              |                     |                           |
|------------------------------------------|--------------|---------------------|---------------------------|
| Sample Name:                             | NSA 1NH2     | Acquired By:        | System                    |
| Sample Type:                             | Unknown      | Sample Set Name:    | PURITY                    |
| Vial:                                    | 8            | Acq. Method Set:    | DS_RNA analysis_4_9_19_MS |
| Injection #:                             | 1            | Processing Method:  | Default                   |
| Injection Volume:                        | 25.00 ul     | Channel Name:       | 2487Channel 1             |
| Run Time:                                | 25.0 Minutes | Proc. Chnl. Descr.: |                           |
| Date Acquired: 5/30/2019 4:00:12 PM EDT  |              |                     |                           |
| Date Processed: 6/6/2019 12:00:28 PM EDT |              |                     |                           |

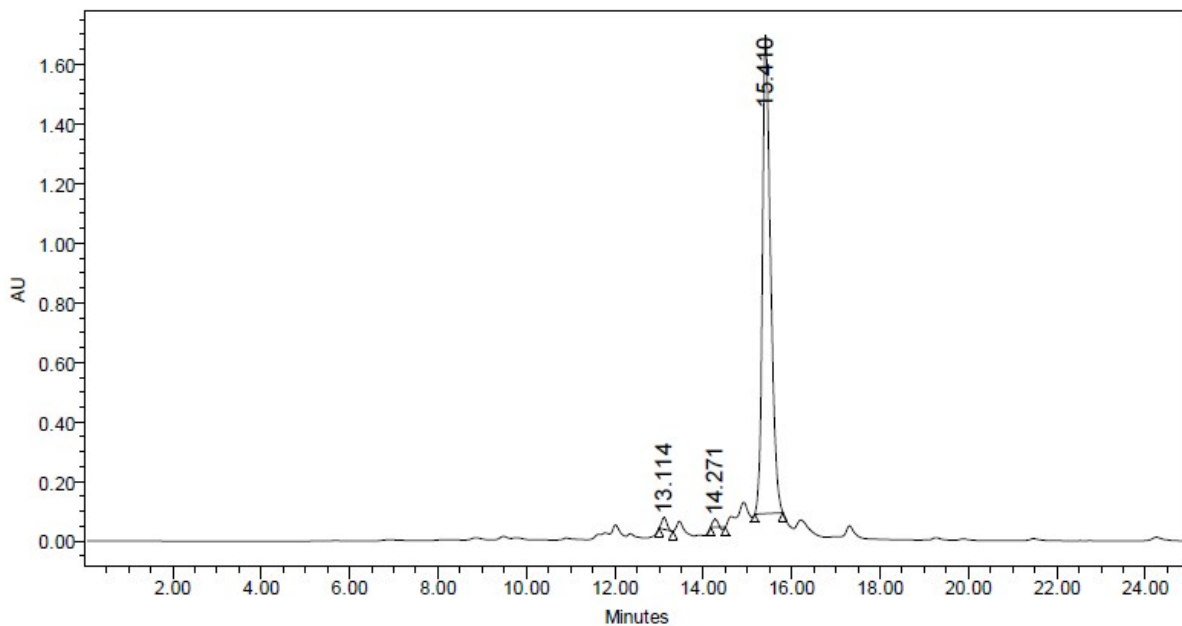

|   | RT     | Area     | % Area | Height  |
|---|--------|----------|--------|---------|
| 1 | 13.114 | 326964   | 1.54   | 39693   |
| 2 | 14.271 | 255222   | 1.20   | 26559   |
| 3 | 15.410 | 20617738 | 97.25  | 1617291 |

**Figure S3.** HPLC chromatogram of amino functionalized NS A1 RNA

SAMPLE INFORMATION

|                                          |              |                     |                           |
|------------------------------------------|--------------|---------------------|---------------------------|
| Sample Name:                             | NSS1         | Acquired By:        | System                    |
| Sample Type:                             | Unknown      | Sample Set Name:    | PURITY                    |
| Vial:                                    | 7            | Acq. Method Set:    | DS_RNA analysis_4_9_19_MS |
| Injection #:                             | 1            | Processing Method:  | Default                   |
| Injection Volume:                        | 25.00 ul     | Channel Name:       | 2487Channel 1             |
| Run Time:                                | 25.0 Minutes | Proc. Chnl. Descr.: |                           |
| Date Acquired: 5/30/2019 3:34:09 PM EDT  |              |                     |                           |
| Date Processed: 6/6/2019 11:59:44 AM EDT |              |                     |                           |

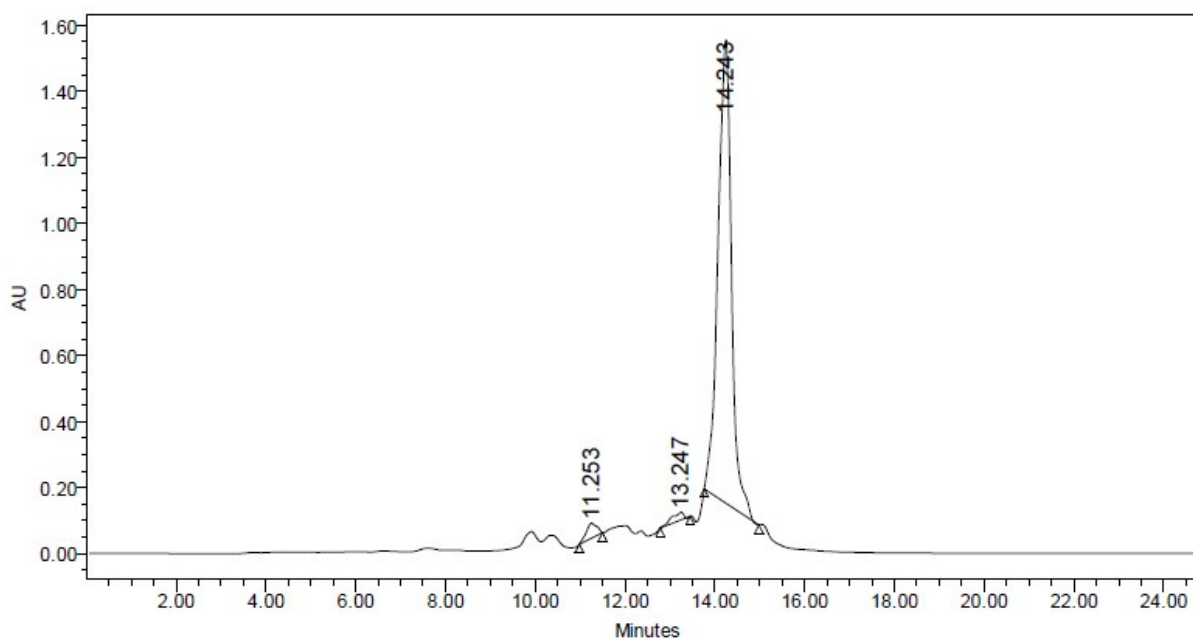

|   | RT     | Area     | % Area | Height  |
|---|--------|----------|--------|---------|
| 1 | 11.253 | 745077   | 2.44   | 45139   |
| 2 | 13.247 | 476309   | 1.56   | 22939   |
| 3 | 14.243 | 29312050 | 96.00  | 1404741 |

**Figure S4.** HPLC chromatogram of NS S1 RNA

SAMPLE INFORMATION

|                                          |              |                     |                                |
|------------------------------------------|--------------|---------------------|--------------------------------|
| Sample Name:                             | c16-2        | Acquired By:        | System                         |
| Sample Type:                             | Unknown      | Sample Set Name:    | test                           |
| Vial:                                    | 4            | Acq. Method Set:    | SS_RNA BIO analysis_4_23_19_MS |
| Injection #:                             | 1            | Processing Method:  | Default                        |
| Injection Volume:                        | 25.00 ul     | Channel Name:       | 2487Channel 1                  |
| Run Time:                                | 40.0 Minutes | Proc. Chnl. Descr.: |                                |
| Date Acquired: 5/30/2019 12:17:05 PM EDT |              |                     |                                |
| Date Processed: 6/6/2019 11:55:44 AM EDT |              |                     |                                |

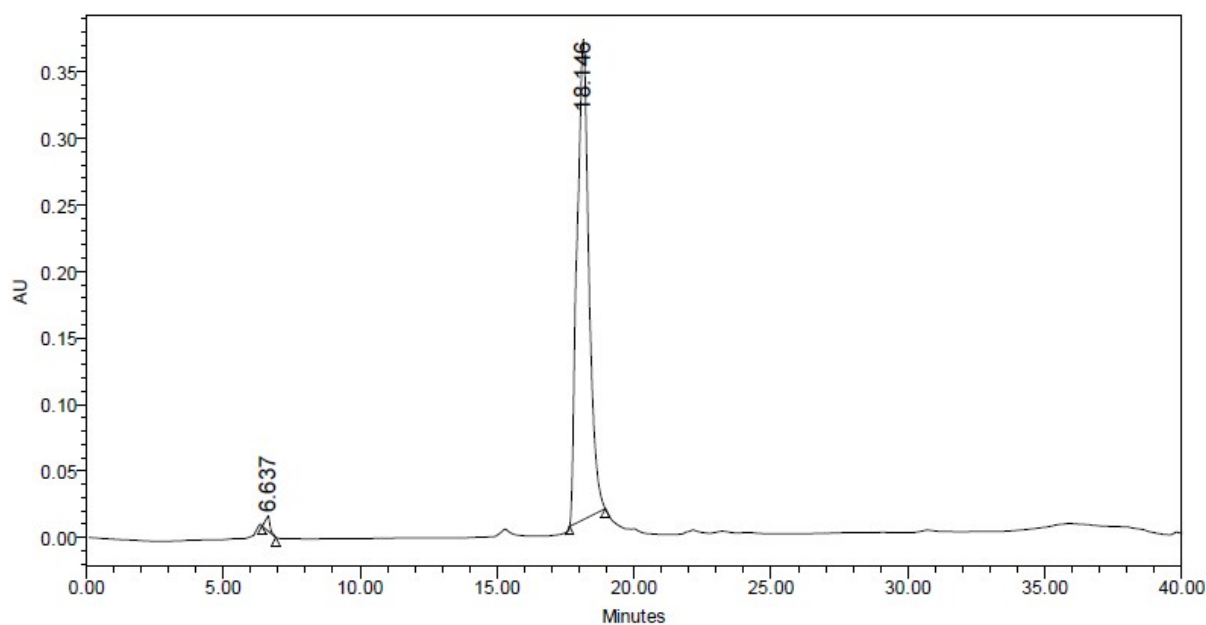

|   | RT     | Area     | % Area | Height |
|---|--------|----------|--------|--------|
| 1 | 6.637  | 127004   | 1.16   | 11052  |
| 2 | 18.146 | 10843518 | 98.84  | 360505 |

**Figure S5.** HPLC chromatogram of C16 conjugated GRP75 S1 RNA

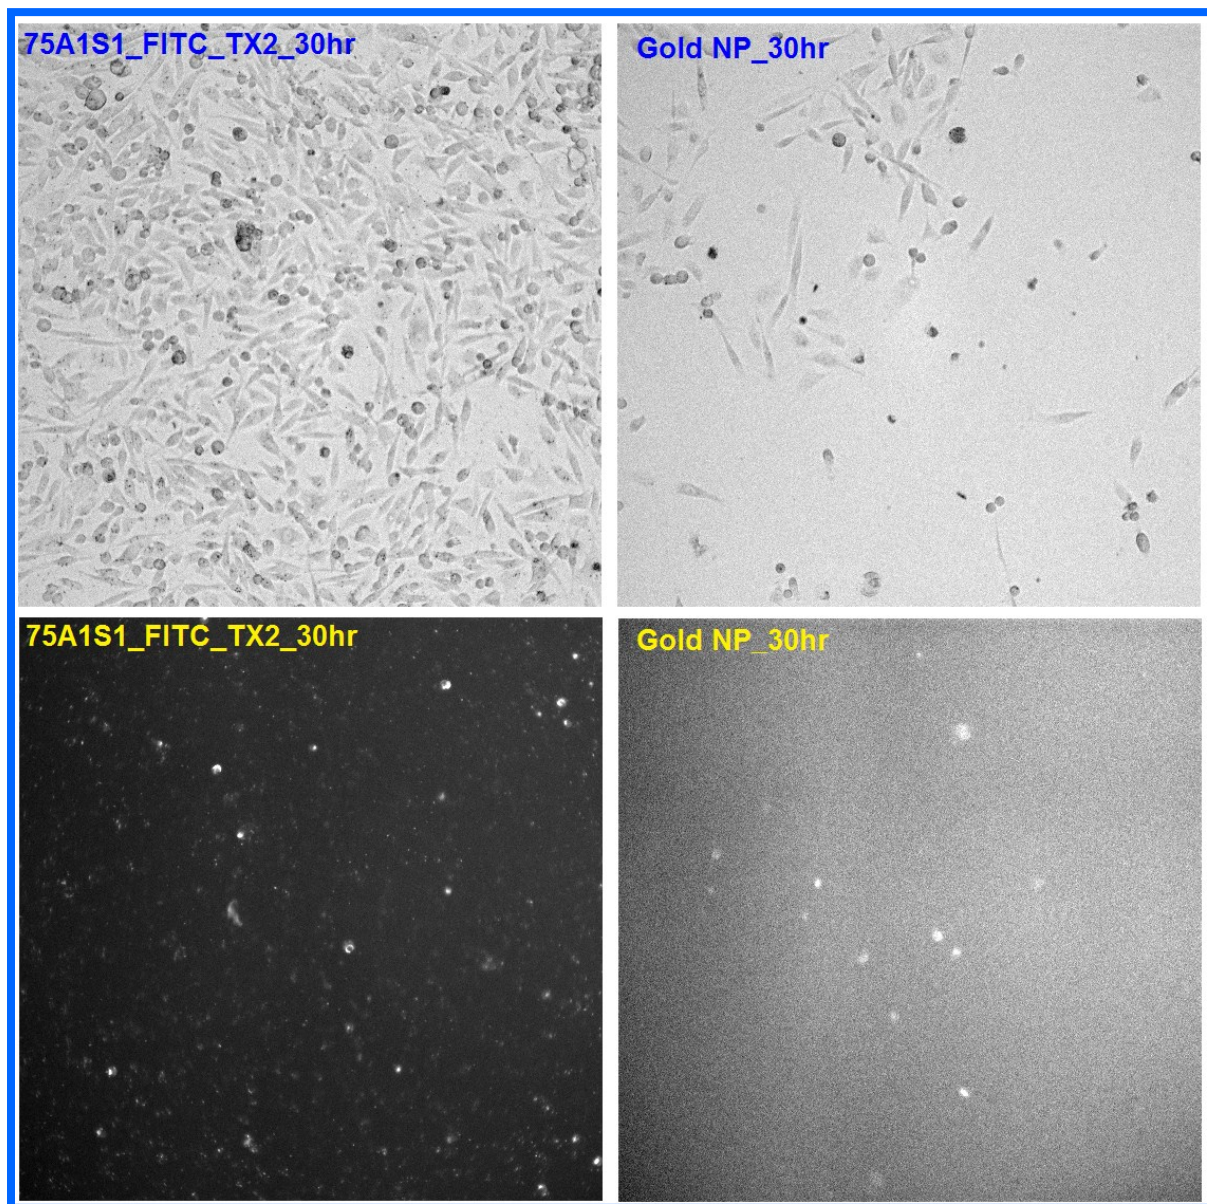

**Figure S6.** High content screen microscopy images for PC-3 cell uptake by FITC-tagged RNA hybrids and citrate-stabilized gold nanoparticles at 30 h.

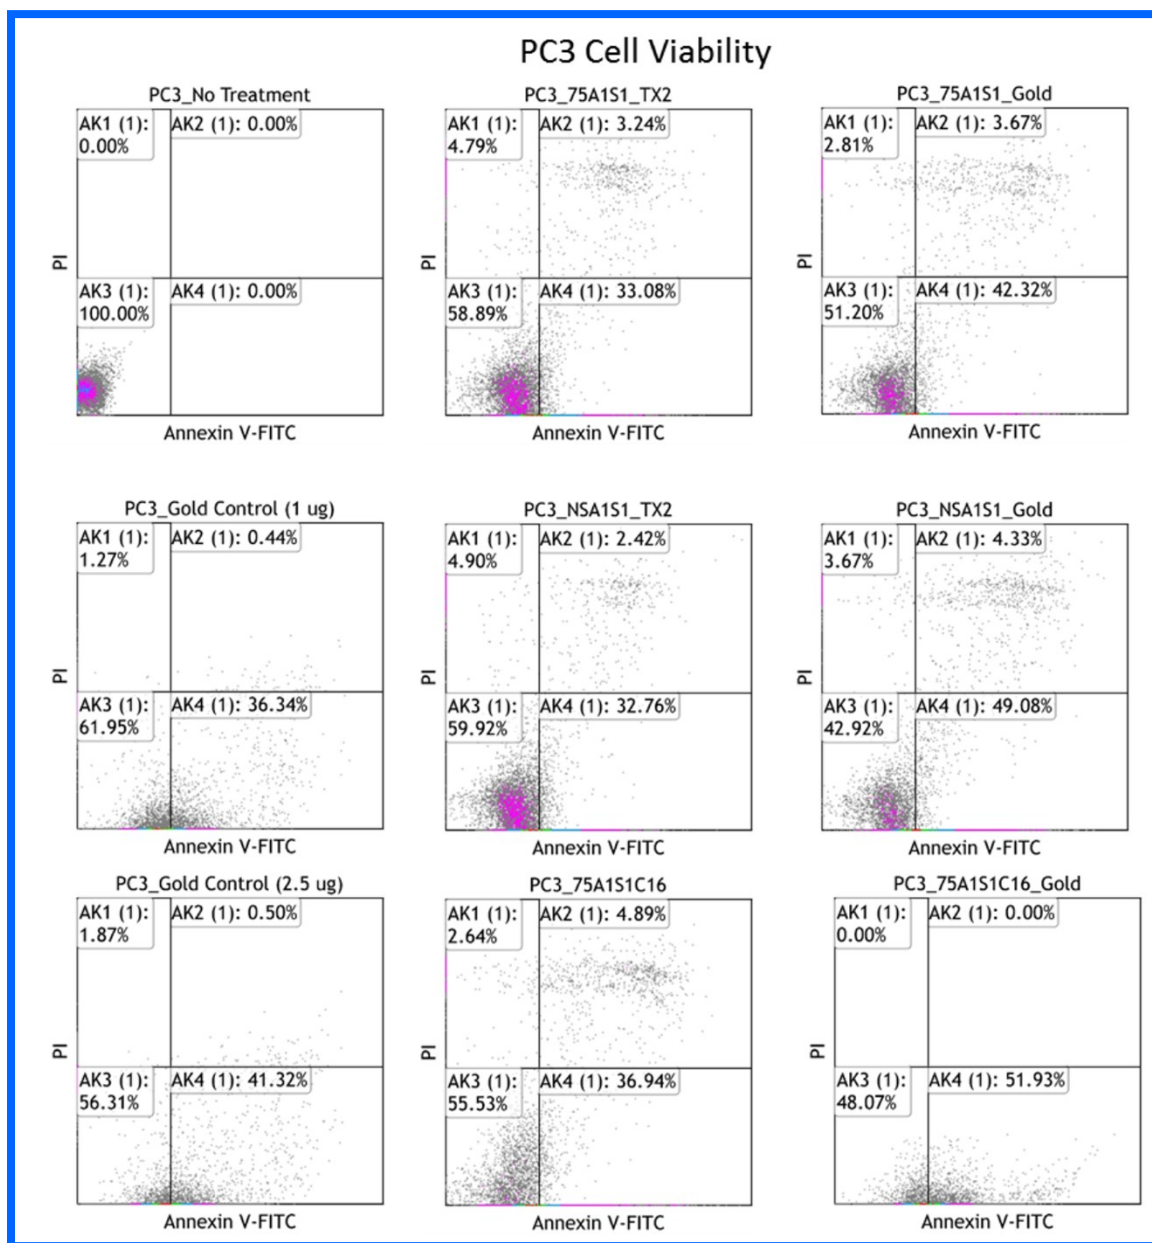

**Figure S7.** Flow-cytometry data for PC-3 cell viability using Annexin V-PI stain.
